# Supplementary material for: A novel biosensor for silver(i) ion detection based on nanoporous gold and duplex-like DNA scaffolds with anionic intercalator
Source: Royal Society of Chemistry journal article supplement (doi:10.1039/c5ra10686a), 2015-01-01
Supplement: c5ra10686a1.pdf [file c5ra10686a1.pdf]

## Supporting Information (SI)

# A novel biosensor for silver(I) ion detection based on nanoporous gold and duplex-like DNA scaffolds with anionic intercalator

Yaoyu Zhou <sup>ab</sup>, Lin Tang<sup>\*ab</sup>, Guangming Zeng<sup>\*ab</sup>, Jingjing Zhu <sup>ab</sup>, Haoran Dong <sup>ab</sup>, Yi Zhang <sup>ab</sup>,

Xia Xie <sup>ab</sup>, Jijia Wang <sup>ab</sup>, Yaocheng Deng <sup>ab</sup>

a College of Environmental Science and Engineering, Hunan University, Changsha, 410082, China,

b Key Laboratory of Environmental Biology and Pollution Control (Hunan University), Ministry of Education, Changsha 410082, Hunan, PR China.

\*

Total number of pages of Supporting Information: 5 (including cover page)

Number of Figures in Supporting Information: 2

Number of Tables in Supporting Information: 2

---

\* Corresponding author: Tel.: +86-731-88822778; Fax.: +86-731-88822778

E-mail: [tanlin@hnu.edu.cn](mailto:tanlin@hnu.edu.cn)(L. Tang), [zgming@hnu.edu.cn](mailto:zgming@hnu.edu.cn) (G.M. Zeng).

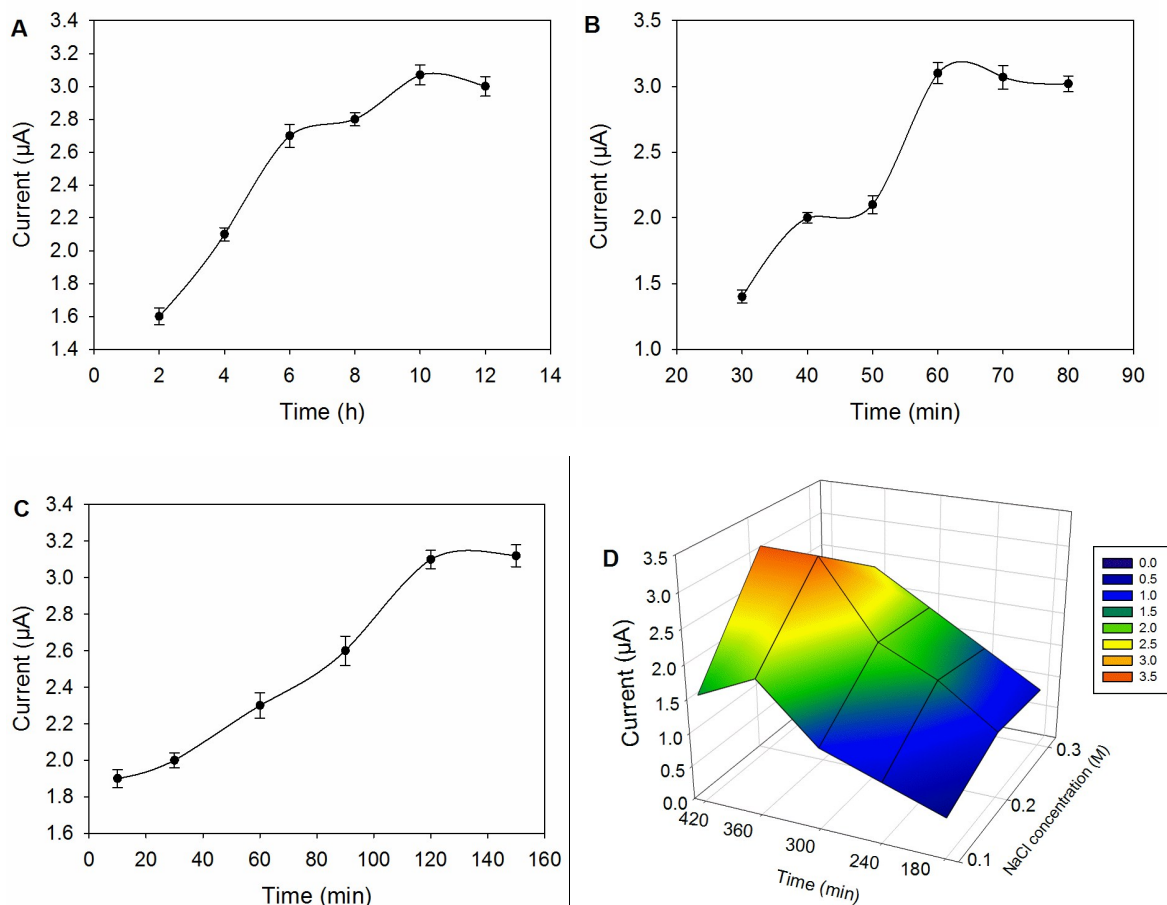

**Fig. S-1.** Optimization of experimental conditions: (A) Effect of the self-assembly time of capture probe; (B) Effect of the hybridization time of (S2+S3); (C) Effect of the time-course of the Ag<sup>+</sup> hybridized with C bases; (D) Effect of the salt concentration and immersing time to AQDS intercalating; All tested electrodes were fabricated by immobilizing 2 µL capture probe on electrodes surfaces at 4 °C. Error bars indicate standard deviations from three replicative tests.

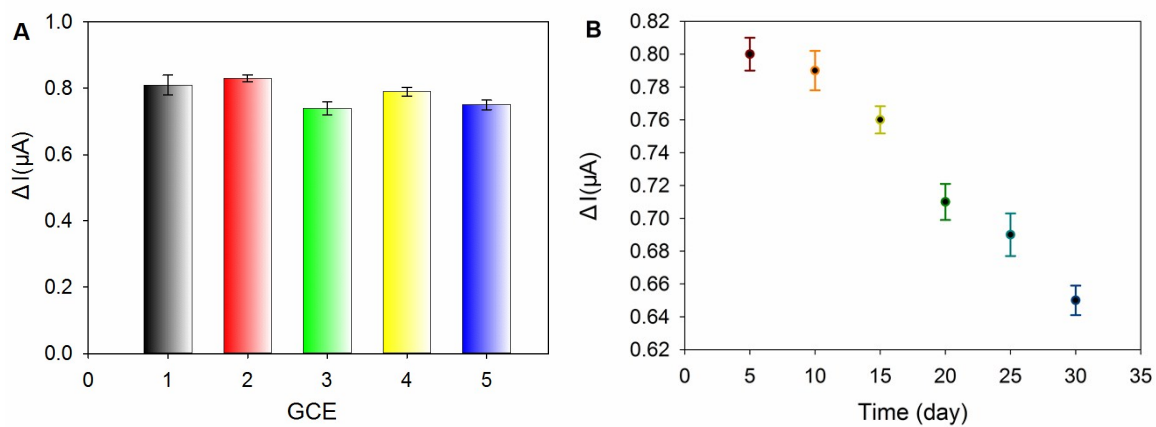

**Fig. S-2.** (A) Five different GCEs constructed by the same procedure on response of biosensor for  $Ag^+$  ( $10^{-8}$  M), (B) Stability of the biosensor in detecting  $10^{-8}$  M  $Ag^+$  solution. Error bars indicate standard deviations from three replicative tests.

**Table S–1** Equivalent circuit element values for the films in Fig. 3C<sup>a</sup>

| Equivalent circuit elements |                   |                    |                     |                      |
|-----------------------------|-------------------|--------------------|---------------------|----------------------|
| electrode                   | $R_{CT}(\Omega)$  | $R_S (\Omega)$     | $C_{dl}(\mu F)$     | $W(m\Omega/s^{1/2})$ |
| GCE                         | 760.0 ( $\pm 3$ ) | 154.7( $\pm 4.5$ ) | 4.024( $\pm 0.5$ )  | 1.504( $\pm 0.052$ ) |
| GCE/NPG                     | 19.9( $\pm 2$ )   | 140.5( $\pm 1.5$ ) | 3.368( $\pm 0.38$ ) | 1.580( $\pm 0.064$ ) |

<sup>a</sup>The values in parentheses represent the standard deviations from at least 3 electrode measurements.

**Table S–2** Ag<sup>+</sup> ions in environmental samples determined by this sensor and atomic absorption spectroscopy (AAS).

| Sample number of Taozi Lake | Addition concentration of Ag <sup>+</sup> (nM) | Biosensor (mean <sup>a</sup> ± SD <sup>b</sup> ) (nM) | atomic absorption spectroscopy (AAS) (mean <sup>a</sup> ± SD <sup>b</sup> ) (nM) | Relative Standard Deviation (%) |
|-----------------------------|------------------------------------------------|-------------------------------------------------------|----------------------------------------------------------------------------------|---------------------------------|
| 1                           | 65                                             | 64.12±3.5                                             | 66.89±4.3                                                                        | 2.99                            |
| 2                           | 5                                              | 5.15±0.3                                              | 4.91±0.21                                                                        | 3.37                            |
| 3                           | 20                                             | 21.35±1.1                                             | 21.92±1.5                                                                        | 1.86                            |
| 4                           | 150                                            | 153.26±4.2                                            | 157.03±3.9                                                                       | 1.72                            |

<sup>a</sup> An average of three replicate measurement. <sup>b</sup>SD =standard deviation
